# Supplementary material for: Health technology assessment in Switzerland: a descriptive analysis of “Coverage with Evidence Development” decisions from 1996 to 2013
Source: HighWire-hosted journal article supplement (doi:10.1136/bmjopen-2014-007021), 2015-03-01
Supplement: bmjopen-2014-007021supp.pdf [file bmjopen-2014-007021supp.pdf]

## **Interview Guide (Version 1.0)**

### About the committee and the process

1. How does the committee work (ELGK)?
2. Which documents do the members receive for the meetings?
3. How influential is the president?

### About the role of the BAG

4. What role does the BAG play?
5. What role does the “Handbook of application for an assumption of costs“ play?
6. How does the preselection of topics work?
7. Which documents does the BAG provide to the members of the ELGK?

### Questions about the method

8. What significance has the CED (=Yes, in evaluation) in the context of the Swiss benefit basket from your point of view?
9. In which situations does the ELGK decide for CED?
10. What kind of uncertainty has to exist for CED to be reasonable? How much evidence is enough?
11. Which methodical approach is from your point of view the most appropriate to eliminate these uncertainties?
12. How should the evaluation be implemented?
13. How would you rate the requirement for a register in this regard?  
Which requirements for such a register do you think are reasonable?
14. Which period of time is in your opinion appropriate for a “Yes, in evaluation”?

15. How should services under a “Yes, in evaluation” (CED) be financed?
16. What does a “No, in evaluation” mean? (A few services in the KLV Annex 1 are still marked as such)

### Examples

17. Describe a successful example of CED in Switzerland? What led to the success?
18. Describe an unsuccessful example of CED in Switzerland? What was the reason for the lack of success?

### Additional aspects

19. How would you rate the transparency in this context?
20. Is there an area of conflict between science and politics? Are there any further areas of conflict?
21. Is industry trying to influence the whole process?
22. Are there any guidelines which facilitate or hinder the work for the job? (e.g. secrecy of the committee, low compensation etc.)

### Closing questions

23. What should be changed or improved in the whole process of the ELGK from your point of view?
24. Are there any further points which appear to you as important in this regard?

Many thanks!
