# Supplementary material for: Health technology assessment in Switzerland: a descriptive analysis of “Coverage with Evidence Development” decisions from 1996 to 2013
Source: HighWire-hosted journal article supplement (doi:10.1136/bmjopen-2014-007021), 2015-03-01
Supplement: bmjopen-2014-007021supp_tables.pdf [file bmjopen-2014-007021supp_tables.pdf]

## Supplementary Tables

Supplementary Table 1a Contested Services evaluated exclusively under "Yes, in Evaluation"

| Contested Service                                                                | Euro-Scan | Introduction | Restriction | Registry | Additional | End  | Duration (y) | Decision |
|----------------------------------------------------------------------------------|-----------|--------------|-------------|----------|------------|------|--------------|----------|
| Dual energy x-ray absorptiometry DXA (previously DEXA)                           | diag      | 01.01.1996   | C           | no       | MCS        | 2002 | 7.00         | yes      |
| Peripheral quantitative computed tomography pQST                                 | diag      | 01.01.1996   | C           | no       | MCS        | 2002 | 7.00         | no       |
| Quantitative ultrasound measurement of mineral bone density                      | diag      | 01.01.1996   | C           | no       | MCS        | 2002 | 7.00         | no       |
| Bone resorption markers to predict risk of osteoporosis-related fractures        | diag      | 01.01.1996   | C           | no       | MCS        | 2002 | 7.00         | no       |
| Bone formation markers to predict risk of osteoporosis-related fractures         | diag      | 01.01.1996   | C           | no       | MCS        | 2002 | 7.00         | no       |
| Lithotripsy for salivary gland stones                                            | proc      | 01.01.1997   | C,I         | yes      | no         | 2003 | 7.00         | yes      |
| Spondylodesis with disc cages                                                    | proc      | 01.01.1999   | I           | no       | no         | 2002 | 3.50         | yes      |
| Radiosurgery with gamma knife Metastasis and inoperable primary tumours          | proc      | 01.01.1999   | I           | yes      | no         | 2003 | 4.25         | no       |
| Anthroposophical medicine                                                        | proc      | 01.07.1999   | S           | no       | no         |      |              |          |
| Chinese medicine                                                                 | proc      | 01.07.1999   | S           | no       | no         |      |              |          |
| Homeopathy                                                                       | proc      | 01.07.1999   | S           | no       | no         |      |              |          |
| Neural therapy                                                                   | proc      | 01.07.1999   | S           | no       | no         | 2005 | 13.00        | no       |
| Phytotherapy                                                                     | proc      | 01.07.1999   | S           | no       | no         |      |              |          |
| Bariatric surgery: gastric bypass, gastric banding, gastroplasty                 | proc      | 01.01.2000   | C,I         | yes      | A          | 2010 | 11.00        | yes      |
| Photodynamic therapy with verteporfin for age-related macular degeneration (AMD) | proc      | 01.07.2000   | I           | yes      | A          | 2006 | 5.50         | yes      |
| Positron-emission tomography (PET)                                               | diag      | 01.01.2001   | C,I         | yes      | MCS        | 2004 | 4            | yes      |
| Autologous hematopoietic stem cell transplantation                               | proc      | 01.01.2002   | C,I         | yes      | Acc        | 2007 | 6            | yes      |
| Allogeneic hematopoietic stem cell transplantation                               | proc      | 01.01.2002   | C,I         | yes      | Acc        | 2007 | 6            | yes      |
| Proton beam radiotherapy                                                         | proc      | 01.01.2002   | C,I         | no       | D          | 2011 | 9.5          | yes      |
| Viscosupplementation treatment for arthritis of the knee                         | proc      | 01.07.2002   | I           | no       | MCS,D      | 2007 | 4.5          | no       |
| Respirative polygraph test in sleep disorders                                    | diag      | 01.07.2002   | S,I         | no       | D          | 2006 | 3.5          | yes      |
| X-ray and ultrasound-guided biopsy for breast cancer                             | diag      | 01.07.2002   | -           | no       | D          | 2007 | 5.5          | yes      |
| Palliative neurosurgery for epilepsy:selective hippocampectomy                   | proc      | 01.07.2002   | C,I         | no       | A,D        | 2008 | 6.5          | yes      |
| Cochlear implant                                                                 | dev       | 01.07.2002   | C,I         | yes      | A          | 2003 | 1.5          | yes      |
| Electrical neuromodulation with implanted device for fecal incontinence          | dev       | 01.01.2003   | C,I         | no       | A,D        | 2007 | 5            | yes      |
| Photodynamic therapy for treatment of neovascularization secondary to myopia     | proc      | 01.01.2006   | I           | yes      | no         | 2011 | 6            | yes      |
| Dynamic interspineous stabilization (DIAM)                                       | dev       | 01.01.2007   | S           | yes      | no         |      |              |          |
| Dynamic spinal stabilization (Dynesys)                                           | dev       | 01.01.2007   | S           | yes      | no         |      |              |          |
| Multiprofessional outpatient programme for overweight children and juveniles     | prog      | 01.01.2008   | I           | no       | D          | 2013 | 6            | yes      |
| Combined in-patient and out-patient rehabilitation for circulation and diabetes  | prog      | 01.07.2009   | I           | no       | no         | 2012 | 3.5          | yes      |
| Proton beam therapy                                                              | proc      | 01.07.2012   | C,S,I       | no       | D          |      |              |          |
| Transcatheter aortic valve implant (TAVI)                                        | dev       | 01.07.2013   | S,I         | yes      | no         |      |              |          |

Supplementary Table 1b Contested Services evaluated exclusively under "No, in Evaluation"

| Contested Service                                               | Euro-Scan | Introduction | Restriction | Registry | Additional | End  | Duration (y) | Decision |
|-----------------------------------------------------------------|-----------|--------------|-------------|----------|------------|------|--------------|----------|
| Pion beam therapy                                               | proc      | 01.01.1993   | none        | no       | no         | 2013 | 18           | no       |
| Radiosurgery (LINAC, gamma-knife)                               | proc      | 01.01.1996   | I           | no       | no         | 2012 | 16.5         | yes      |
| Artificial insemination                                         | proc      | 01.01.1997   | none        | no       | no         | 2001 | 4            | yes      |
| Anesthesia-assisted rapid opioid detoxification                 | proc      | 01.01.1998   | none        | no       | no         | 2013 | 16           | no       |
| Hip protection                                                  | dev       | 01.01.1999   | none        | no       | no         | 2000 | 1            | no       |
| Transmyocardial laser revascularization                         | proc      | 01.01.2000   | none        | no       | no         | 2013 | 14           | no       |
| Implantation of myopia lenses                                   | dev       | 01.01.2000   | none        | no       | no         | 2004 | 5            | yes      |
| Extracorporeal shockwave therapy in orthopedics                 | proc      | 01.01.2002   | none        | no       | no         | 2013 | 12           | no       |
| Autologous HSCT for autoimmune disorders                        | proc      | 01.01.2002   | C,I         | yes      | ACC        | 2007 | 6            | yes      |
| Allogeneic HSCT for autoimmune disorders                        | proc      | 01.01.2002   | C,I         | yes      | ACC        | 2007 | 6            | yes      |
| Allogeneic HSCT for carcinoma of the breast                     | proc      | 01.01.2002   | C,I         | yes      | ACC        | 2012 | 11           | no       |
| Transplantation of allogeneic islets of Langerhans <sup>2</sup> | proc      | 01.07.2002   | none        | no       | no         | 2010 | 8            | yes      |
| Transplantation of autologous islets of Langerhans <sup>2</sup> | proc      | 01.07.2002   | none        | no       | no         | 2010 | 8            | yes      |
| Isolated small bowel transplant                                 | proc      | 01.07.2002   | none        | no       | no         | 2010 | 8            | yes      |
| Vaccine with dendritic cells for melanoma                       | proc      | 01.07.2002   | none        | no       | no         | 2013 | 12           | no       |
| Cardiac resynchronization therapy                               | proc      | 01.01.2003   | none        | no       | no         | 2004 | 1            | yes      |
| Human papillomavirus (HPV) screening                            | diag      | 01.07.2002   | none        | no       | no         | 2013 | 12           | no       |
| Ambulatory balneo-phototherapy                                  | proc      | 01.07.2002   | none        | no       | no         | 2013 | 12           | no       |
| Laser treatment for acne scars                                  | proc      | 01.07.2002   | none        | no       | no         | 2013 | 12           | no       |
| Small bowel liver and multivisceral transplant                  | proc      | 01.07.2002   | none        | no       | no         | 2010 | 8            | yes      |
| Magnetoencephalography                                          | diag      | 01.07.2002   | none        | no       | no         | 2013 | 12           | no       |
| Radiofrequency ablation for varicose veins                      | proc      | 01.07.2002   | none        | no       | no         | 2013 | 11.5         | no       |
| Intracoronary brachytherapy                                     | proc      | 01.01.2003   | none        | no       | no         |      |              |          |
| Dilatation of tear duct with Lacri-Cath                         | proc      | 01.01.2003   | none        | no       | no         | 2004 | 2            | no       |
| Isolated pancreas transplant                                    | proc      | 01.07.2002   | none        | no       | no         | 2010 | 8            | yes      |
| Balloon kyphoplasty for vertebral fractures                     | dev       | 01.01.2004   | none        | no       | no         | 2004 | 1            | yes      |

Supplementary Table 1c Contested Services evaluated under both "Yes, in Evaluation" and "No, in Evaluation"

| Contested Service                                                        | Euro-Scan | Introduction | Restriction     | Registry | Additional      | End  | Duration (y) | Decision |
|--------------------------------------------------------------------------|-----------|--------------|-----------------|----------|-----------------|------|--------------|----------|
| Polysomnography                                                          | diag      | 01.07.2002   | I,C             | no       | D               | 2013 | 11.50        | no       |
| Electrical neuromodulation with implanted device for voiding dysfunction | dev       | 01.01.2000   | I,C             | yes      | D               | 2007 | 8.00         | yes      |
| ThinPrep Pap Test                                                        | diag      | 01.07.2000   | none            | no       | no              | 2004 | 5.00         | yes      |
| Allogeneic skin graft for intractable skin ulcer                         | proc      | 01.01.2000   | I               | no       | D               | 2008 | 9.00         | yes      |
| Autologous epidermal skin analogues                                      | dev       | 01.01.2003   | I               | no       | A,D             | 2008 | 6.00         | yes      |
| Low-dose-rate brachytherapy for localized cancer of prostate             | proc      | 01.07.2002   | I,C,S           | no       | D               | 2011 | 9.50         | yes      |
| Liver transplantation with living donor                                  | proc      | 01.07.2002   | C               | yes      | no              | 2011 | 9.50         | yes      |
| Intervertebral disc prosthesis                                           | dev       | 01.01.2004   | I,S             | yes      | no              |      |              |          |
| Embolization of uterine myomata <sup>1)</sup>                            | proc      | 01.01.2004   | S <sup>1)</sup> | no       | D <sup>1)</sup> | 2012 | 9            | yes      |

1) Non continuous evaluation period. No, i.e. in 2004, Yes, i.e. in 2010-2012. Limitations only in second period
